# Supplementary material
Source: publisher site journal article supplement (https://www.spandidos-publications.com/2524/downloadSupplementary)

Figure S1. mRNA and protein expression of TGF $\beta$ R2 in cancer cells upon TGF $\beta$ R2 overexpression. oe-NC and oe-TGF $\beta$ R2 were respectively transfected into Eca-109 cells. (A) TGF $\beta$ R2 mRNA expression in each group was detected by RT-qPCR; (B) TGF $\beta$ R2 protein expression in each group was assessed by western blot analysis. \*P<0.05, compared to oe-NC.

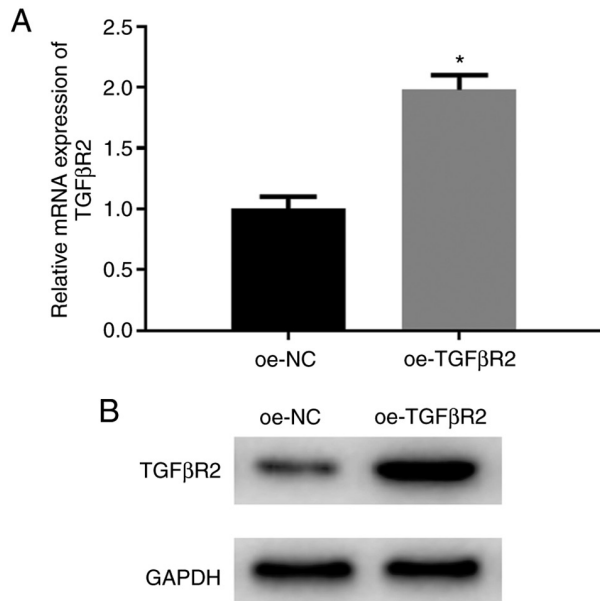

Supplement: Supplementary file 1 [file downloadSupplementary]
